# Supplementary material for: The Pentatricopeptide Repeat Protein MEF100 Is Required for the Editing of Four Mitochondrial Editing Sites in Arabidopsis
Source: MDPI journal article supplement (doi:10.3390/cells10020468), 2021-02-22
Supplement: s1 [file s1]

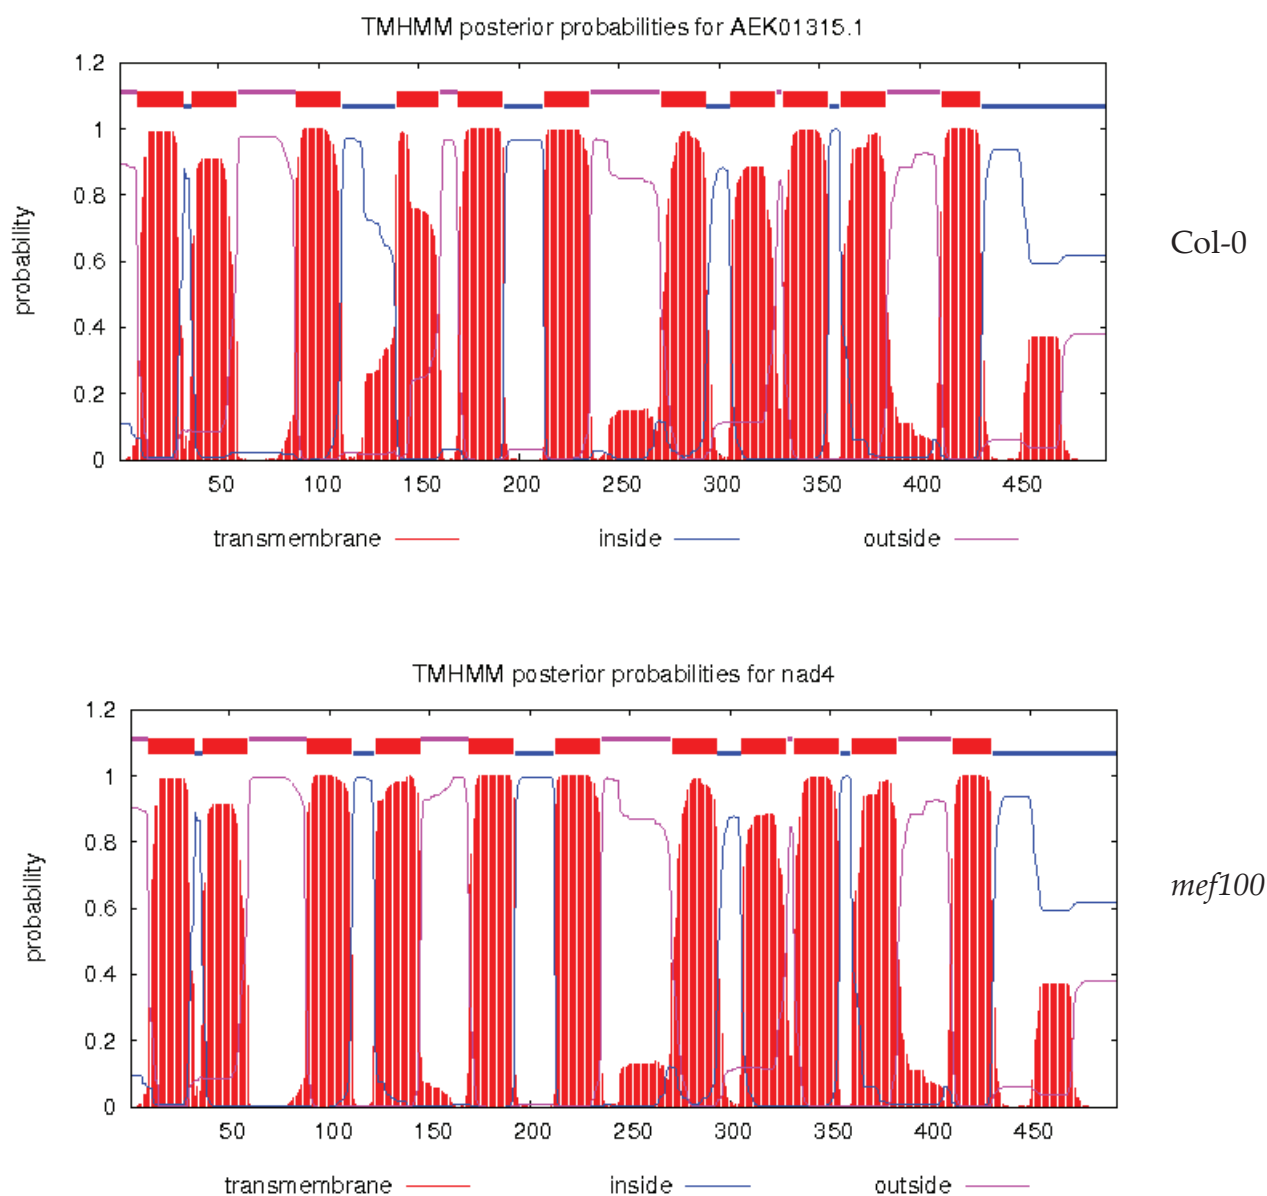

**Figure S4.** Trans-membrane helix predictions obtained by TMHMM for the WT Nad4 in Col-0 (top panel) and Nad4 in the *mef100* mutant (R139C, bottom panel). The trans-membrane segments are in thick red lines, the inside loops are represented by thin blue lines and the outside loops in thin magenta lines.
